# Supplementary material for: Novel Models of Streptococcus canis Colonization and Disease Reveal Modest Contributions of M-Like (SCM) Protein
Source: MDPI journal article supplement (doi:10.3390/microorganisms9010183), 2021-01-16
Supplement: s1 [file s1]

## Novel models of *Streptococcus canis* colonization and disease reveal modest contributions of M-like (SCM) protein

Ingrid Cornax, Jacob Zulk, Joshua Olson, Marcus Fulde, Victor Nizet, Kathryn A Patras

### Supplementary Material

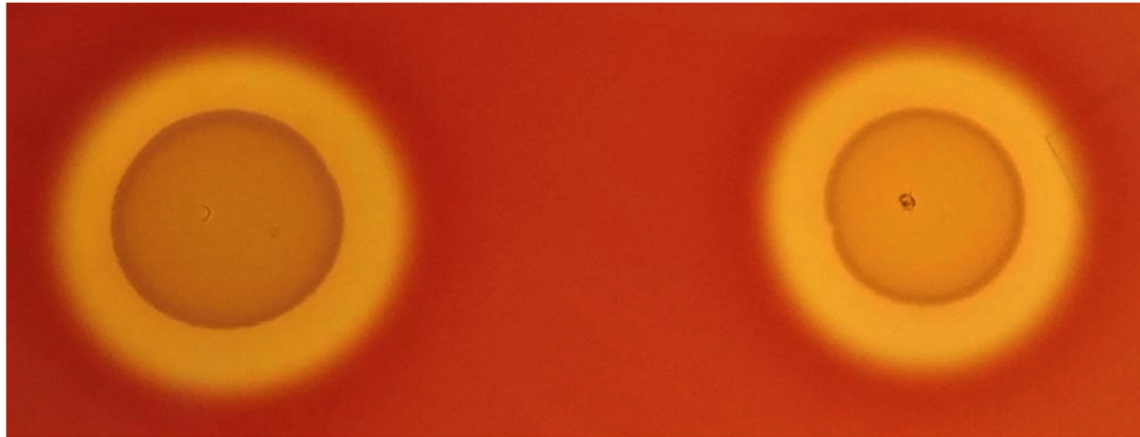

G361

G361  $\Delta scm$

**Supplemental Figure 1. SCM has no effect on hemolytic activity.** Representative image of *S. canis* G361 or G361 $\Delta scm$  spotted on blood agar plates and grown for 24 h at 37°C.

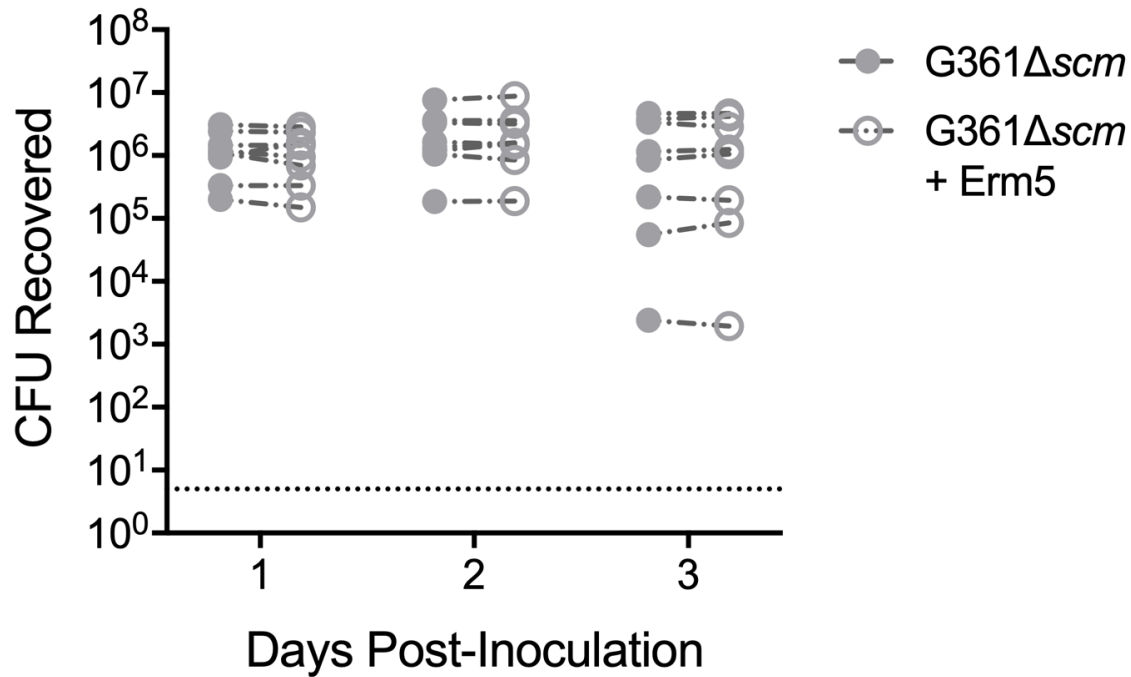

**Supplemental Figure 2. SCM insertional mutagenesis is stable *in vivo*.** CD1 female mice were vaginally administered  $1 \times 10^7$  CFU of G361 $\Delta$ scm. Mice were vaginally swabbed daily, and the levels of bacterial CFU recovered from swabs, plated on media with or without antibiotic selection are shown. Dotted line indicates limit of detection. Data were analyzed by Wilcoxon matched-pairs signed rank test and determined not significant.
