# Supplementary material for: Novel Models of Streptococcus canis Colonization and Disease Reveal Modest Contributions of M-Like (SCM) Protein
Source: Microorganisms. 2021 Jan 16;9(1):183. doi: 10.3390/microorganisms9010183 (PMC7829700; doi:10.3390/microorganisms9010183)
Supplement: Supplementary file 1 [file microorganisms-09-00183-s001.zip › Supplementary Material Raw Data Files.xlsx]

## Sheet: Figure 1
Panel A
Time (min)	G361					G361 ΔSCM
0	0.064625	0.065063	0.062	0.092	0.09725			0.062	0.11225	0.1045
30	0.0875	0.10375	0.08225	0.0975	0.11225			0.08825	0.11325	0.10675
60	0.0915	0.1015	0.09075	0.1025	0.129			0.094	0.11425	0.12625
90	0.1025	0.11525	0.1145	0.123	0.151			0.11225	0.118	0.143
120	0.1185	0.13725	0.14675	0.1805	0.176			0.139	0.1305	0.16925
150	0.1475	0.16175	0.2145	0.21575				0.199	0.13975
180	0.1795	0.252	0.29475	0.294				0.27675	0.17375
210	0.214	0.3045	0.3675	0.3255	0.31225			0.368	0.19825	0.326
240	0.268	0.33925	0.406	0.387	0.36875			0.40975	0.2895	0.3825
270	0.3155	0.3705	0.4305	0.40925	0.383			0.43925	0.33825	0.398
300	0.3515		0.459	0.42675	0.40275			0.45725	0.3715	0.4195
330	0.358		0.4775	0.44675	0.41525			0.467	0.396	0.4335
360			0.48075					0.47775
Panel B
Time (min)	G361					G361 ΔSCM
0	0.074	0.04875	0.051	0.0845	0.09875			0.051	0.125	0.103
30	0.0785	0.0565	0.084	0.08725	0.10775			0.07025	0.124	0.11275
60	0.0905	0.05925	0.08975	0.09525	0.12325			0.07375	0.1345	0.1305
90	0.11	0.0615	0.1045	0.11725	0.144			0.08275	0.14025	0.153
120	0.152	0.0695	0.1255	0.187	0.172			0.095	0.15725
150	0.1815	0.074	0.175	0.23775				0.1255	0.1745	0.18425
180	0.22325	0.10425	0.25	0.32025				0.187	0.23925
210	0.26325	0.135	0.324	0.34175	0.306			0.293333	0.282	0.34525
240	0.301	0.1675	0.35	0.3745	0.33425			0.353333		0.36775
270	0.317	0.1945	0.361667	0.38025	0.33075			0.380667	0.393	0.36625
300	0.325		0.364	0.38275	0.3295			0.377667	0.4055	0.3655
330			0.360667	0.38625	0.327			0.380667	0.4025	0.36175
360			0.365333					0.383333	0.40425
Panel C
	G361					G361 ΔSCM					5448					5448 Δemm1
THB	100	100	100	100	100	124.62	23.7286	36.6589	52.4645	60.3594	100	100	100	100	100	64.8802	81.5592	26.6697	43.0434	32.4298
RPMI	100	100	100	100	100	135.587	89.6759	87.2274	153.723	78.1526	100	100	100	100	100	99.3767	118.717	138.549	103.176	90.6339

## Sheet: Figure 2
Panel A
G361	G361 Δscm
93.8525	86.4516
174.038	106.623
41.0569	54.5259
Panel B
Time (min)	G361							G361 Δscm
0	1.13099	0.92602	1.79438	1.02658	1.14363	1.04455	1.10024	0.972639	1.15518	1.11729
10	1.19443	0.928653	1.87061	1.0171	2.27442	1.05522	1.10018	0.951765	1.21094	2.28339
20	1.20504	0.929088	2.05153	1.10545	3.12729	1.54349	1.14267	0.958065	1.28334	3.15386
30	1.29848	0.93953	2.17604	1.50985	3.58651	1.9223	1.37839	0.967366	1.3887	3.65035
40	1.35194	0.941071	2.4345	1.81181	3.72162	2.16496	1.55146	0.961021	1.44209	3.81258
50	1.4199	0.94752		1.9484	3.79342	2.35736	1.76687	0.971476	1.50461	3.90156
60	1.41522	0.969368		2.05128	3.8132	2.52565	1.9058	0.970588	1.53167	3.94861
75	1.44993	0.965205		2.15865	3.75601	2.68634	2.11319	0.96741	1.56616	3.85867
90	1.45943	0.871008		2.19764	3.70232	2.78359	2.20389	0.975064	1.56915	3.7807
120	1.47793			2.34522	3.60303		2.31114		1.59459	3.60381
Panel C
G361	G361Δscm	5448
174.18	128.065	163.333
137.5	119.536	75.6579
81.3008	47.4138	38.6059
Panel D
G361	G361Δscm	5448	5448 Δemm1
0.500371	0.824674	0.997446	0.53702
0.326071	0.377946	1.61035	0.419446
0.32144	0.183016	0.631866	0.299414
0.915964	0.416482	0.760339	0.472062
Panel E
	WT						Δscm
30 min	202.128	92.1053	173.497	120.536	193.548	4.46078	223.485	130.952	127.033	155.449	197.368	2.33333
60 min	140.071	0	184.426	107.143	309.14	2.13235	166.667	206.349	156.504	49.6795	276.316	1.38889
Panel F	WT					Δscm
30 min	6.20567	3.59649	20.082	15.4762	4.08602	9.84848	5.43651	21.5447	32.3718	6.88596
60 min	1.18794	2.45614	10.929	4.46429	4.56989	2.08333	4.0873	12.6016	15.2244	9.29825
Panel G
	1:100		1:1000		1:10000
1	486		365		356
2	378		319		349
3	386		353		324
4	430		351		314
5	494		344		323
6	401		341		352
7	475		386		374
8	520		393		321
9	452		341		324
10	420		395		359
11	450		341		316
12	506		339		347
13	587		306		311
14	421		340		333
15	395		344		307
16	566		357		314
17	537		391		367
18	487		398		334
19	458		379		353
20	387		345		299
+ Ctrl	818		821		653
- Ctrl	317		334		330

## Sheet: Figure 3
Panel A
G361	G361 Δscm
252.688	376.344
112.903	116.667
330.882	166.667
254.386	250.943
281.25	300
Panel B
	G361																				G361Δscm
Day 1	0	9.028	4.58	5.922	0	9.101	3.795	0	3.286	3.302	3.742	7.909	12.755	0	0	2.378	10.842	3.801	6.383	6.902	0	10.17	4.713	3.792	0	9.728	5.993	0	6.791	0	1.944	4.352	4.904	6.21	5.992	3.786	4.767	0.751	7.711	4.03
Day 2	0	13.427	5.515	3.767	0	7.249	4.035	0	3.84	2.217	5.697	8.057	8.157	13.446	0	2.705	14.237	3.022	5.67	3.441	0	10.314	6.374	3.64	1.609	9.521	6.487	6.238	4.375	3.023	4.243	0	4.726	16.73	8.478	4.227	9.707	0.905	5.462	2.578
Day 3	0	7.494	3.307	1.394	0.572	11.514	4.56	12.089	7.509	1.589	9.194	5.962	3.907	11.212	0	4.703	11.917	2.342	9.52	3.44	5.933	8.739	2.048	3.419	1.005	4.768	5.462	4.385	5.258	0	5.988	3.357	3.627	17.936	4.013	2.325	2.733	3.718	6.253	1.863

## Sheet: Figure 4
Panel A
G361	G361Δscm	COH1
98.8372	64.9039	4.16
43.103	64.1447	7.26
72.222	71.4285	3.71
80.555	89.2857	7.92
		5.57
		3.32
Panel B
	G361																		G361Δscm																		COH1
Day 1	3900000	7950000	755000	2700000	17500000	500000	14850000	3100000	50750000	640000	15000000	1000000	460000	1900000	5000000	1300000	395000	1750000	16950000	1350000	135000	4900000	6050000	200	425000	1650000	1050000	4300000	200000	1200000	1100000	335000	3100000	1450000	950000	2450000	150	1	3000000	1	1050000	1	2850000	400	1300000	1	6550000	2400000	1450000
Day 2	2700000	1500000	6700000	4750000	2300000	2000000	1050000	2950000	3450000	25000	2350000	200000	2300000	110000	1	1250000	750000	1100000	595000	1250000	1950000	2950	13500	9600000	6450000	1	720000	3050000	1200000	1350000	7650000	1050000	1650000	3350000	185000	3600000	95000	110000	1600	50	3450000	3550000	1350	5050000	2400000	15000000	2150000	2000000	1350000
Day 3	3100000	360000	200	1385000	1150000	4550000	1050000	1410000	2050000	205000	1550000	350000	2850000	305000	1	1700000	1	1200000	1220000	2350000	1	2250000	400000	3400000	50	1800	1	1	220000	55000	2400	850000	3750000	4650000	3400000	1150000	2550000	2300000	1	1	200000	800000	1	1000000	1	5650000	1750000	750000	1
Panel C
	WT G361																		Δscm																		Control
CD8+	0	2.6	11.7	3.9	0	3.9	2.6	1.3	3.9	1.3	33	19	131	51	25	18	211	23	0	2.6	10.4	13	0	0	2.6	5.2	3.9	3.9	27	29	91	25	20	18	27	15	5.2	5.2	3.9	5.2	30	19	37	27	22	43	40	38
c-kit+ FcεRI+	0	0	0	1.3	0	1.3	0	0	0	0	3	0	4	2	4	0	9	0	0	0	0	5.2	0	0	1.3	1.3	0	0	3	0	6	0	3	0	0	0	0	1.3	0	3.9	6	0	3	5	2	0	2	5
CD11b+ F4/80+	0	1.3	0	0	0	0	0	0	1.3	1.3	6	6	0	3	3	3	0	5	0	0	0	5.2	0	0	0	0	0	1.3	0	3	0	6	0	0	4	2	0	0	0	1.3	0	3	6	7	3	3	0	2
CD11b+ Ly6G+	105.3	0	1532.7	583.7	0	585	15.6	2.6	0	1.3	0	0	1754	104	0	0	4582	2	0	1.3	1483.3	16.9	0	0	215.8	14.3	1475.5	70.2	0	17	2091	0	29	39	28	0	3315	1244.1	575.9	0	26	209	2	0	0	639	25	0
CD11b+/- MHC-II+	0	3.9	26	0	0	7.8	1.3	1.3	0	0	4	4	35	36	6	3	463	4	0	1.3	6.5	3.9	0	0	7.8	5.2	132.6	0	3	12	1155	8	5	4	0	4	421.2	111.8	39	0	32	23	7	5	4	4	43	10
Panel E	WT G361																				Δscm
Day 1	320000	60000	21500	2550000	3450000	515000	3350000	2100000	0	4400000	0	2100	195000	650000	0	350000	110000	900000	350000	550000	250000	120000	13500	2300000	2200000	180000	2600000	1150000	0	2000000	0	1900	240000	900000	0	600000	230000	1950000	600000	1150000
Day 2	385000	435000	205000	195000	600	365000	330000	950000	0	1600000	1900000	2100000	250000	130000	4500000	1100000	500000	400000	1150000	2200000	240000	195000	65000	100000	50	130000	165000	750000	0	300000	2450	1400000	2050000	16000	0	1700000	600000	200000	400000	600000
Day 3	115000	0	320000	480000	0	6400000	1500000	38500	0	0	950000	1600000	4100000	0	650000	100	1300000	1100000	4800000	0	350	0	350	1000	0	1850	1550	250	0	0	200	750000	2800000	0	0	50	650000	1250000	1000000	0
[truncated: 5 more columns]
